## RESEARCH ARTICLE

# Simple models highlight differences in the walking biomechanics of young children and adults

Vivian L. Rose and Christopher J. Arellano\*

## ABSTRACT

Adults conserve metabolic energy during walking by minimizing the step-to-step transition work performed by the legs during double support and by utilizing spring-like mechanisms in their legs, but little is known as to whether children utilize these same mechanisms. To gain a better understanding, we studied how children (5–6 years) and adults modulate the mechanical and metabolic demands of walking at their preferred speed, across slow (75%), preferred (100%) and fast (125%) step frequencies. We quantified (1) the positive mass-specific work done by the trailing leg during step-to-step transitions and (2) the leg's spring-like behavior during single support. On average, children walked with a 36% greater net cost of transport (COT;  $\text{J kg}^{-1} \text{m}^{-1}$ ) than adults ( $P=0.03$ ), yet both groups increased their net COT at varying step frequencies. After scaling for speed, children generated ~2-fold less trailing limb positive scaled mechanical work during the step-to-step transition ( $P=0.02$ ). Unlike adults, children did not modulate their trailing limb positive work to meet the demands of walking at 75% and 125% of their preferred step frequency. In single support, young children operated their stance limb with much greater compliance than adults ( $k = 6.23$  versus  $11.35$ ;  $P=0.023$ ). Our observations suggest that the mechanics of walking in children aged 5–6 years are fundamentally distinct from the mechanics of walking in adults and may help to explain a child's higher net COT. These insights have implications for the design of assistive devices for children and suggest that children cannot be simply treated as scaled-down versions of adults.

**KEY WORDS:** Child, Locomotion, Energetics, Metabolic, Spring

## INTRODUCTION

Historically, simple models have been instrumental for understanding how humans control the lifting and forward motion of the body's center of mass (COM) during walking. Simple models reduce the body to a point mass supported by two stiff or, alternatively, spring-like struts that characterize an 'optimal' transfer or redirection of mechanical energy of the COM (Antoniak et al., 2019; Cavagna and Margaria, 1966; Donelan et al., 2002; Geyer et al., 2006). With more efficient transfer or redirection, less mechanical work is required of the muscles and tendons to propel the COM. Lowering the mechanical work required for walking is associated with lowering the demand for consuming metabolic energy. This is now recognized as a fundamental principle of locomotion biomechanics, and one might reason that these simple

models, the principles for which were derived from experimental data on adults, could be applied to young children.

However, recent insights suggest that minimizing the work performed by the legs is a dynamic process that must be learned, and which may depend on the biological and morphological constraints of the body. Bril et al. (2015) use a simple model to show how young, typically developing children (1–5 years) gradually learn to modulate the distance between their COM and center of pressure, which dynamically changes during the gait cycle. Modulating the distance between the COM and center of pressure is governed by the forces that the legs generate in the vertical and anterior–posterior directions. But in particular, it appears that generating forces in the anterior–posterior direction (i.e. propulsive forces) is a skill learned much later in childhood, which requires tuning and control to achieve balance and elicit the desired motion in the forward direction (Brenière and Bril, 1998; Bril et al., 2015). Several studies have also highlighted differences between the typical ground reaction profiles generated by young children and adults (Dewolf et al., 2020; Takegami, 1992), and have used simple models to suggest that mechanical work minimization may not be the optimal strategy for young children (Usherwood et al., 2018). This raises the question as to how the walking pattern of young children should be modeled, recognizing that their walking mechanics may not simply be scaled-down versions of those observed in adults.

For the same simple models to apply and scale to children, several assumptions must be made about their walking behavior. First, we must assume that the inertial and gravitational forces characteristic of walking will scale in proportion so that comparisons can be made across 'scaled speed'. Dimensionless speed, e.g. the Froude number, is a widely used method to scale when comparing walking dynamics between children and adults; however, the Froude equation is based on the idea of dynamic similarity (Alexander and Jayes, 1983). Dynamic similarity means that multiplying all linear dimensions, time intervals and forces by constant factors would result in identical walking patterns. Deviations from dynamic similarity are observed in young children (Kramer and Sarton-Miller, 2008; Usherwood et al., 2018), and the Froude number makes no allowance for differences in shape. Differences in shape, or anthropomorphic proportions, may be an important consideration when making metabolic comparisons within a species, or in animals relatively close in size (Kramer and Sylvester, 2013). Alternative scaled speeds, such as the Strouhal and Groucho number (Alexander, 1989; Blickhan, 1989; McMahon et al., 1987) may be used when elastic forces are considered, such as in running or when a spring-like element is added to a walking template (Geyer et al., 2006).

Second, we must assume that young children have the muscular capacity to generate and control the force and mechanical work required to move the COM in the most economical way possible. During walking, the muscular capacity of muscles surrounding the hip and the ankle joints is particularly important for propulsion and stability (Brenière and Bril, 1998; Ishikawa et al., 2005). Compared

Department of Health and Human Performance, University of Houston, Houston, TX 77024, USA.

\*Author for correspondence (carellano@uh.edu)

 C.J.A., 0000-0001-9672-3497

Received 17 June 2021; Accepted 18 October 2021

with adults, young children display many differences in muscle and tendon properties. They have a proportionally smaller cross-sectional area of plantar flexor muscles, differences in Achilles tendon compliance (Waugh et al., 2012), slower rates of muscle force development, and lower magnitudes of relative maximum force production during isolated contractions (Radnor et al., 2018). Further experiments would help to determine how these properties influence functional or metabolic differences during walking. However, given the importance of muscles and tendons to supporting body weight and redirecting the COM – both critical for economic walking in adults (Donelan et al., 2002; Grabowski et al., 2005) – it is conceivable that immature muscle–tendon capacities influence a young child’s ‘optimal’ walking solution. Of the few studies that specifically examine COM motion in children, normalized COM amplitudes in the sagittal plane are proportionally greater than in adults until around the age of 7–9 years (Dierick et al., 2004), which may reflect a crucial period of dynamic change in the maturation of both muscle and tendon (Malloggi et al., 2019; Waugh et al., 2013).

Finally, we must assume that children minimize their metabolic cost during walking, and that this cost is proportional to their size. Overall, when walking at a range of speeds, children over 6 years exhibit an ‘optimal’ speed that minimizes cost (DeJaeger et al., 2001). Yet, surprisingly, at ‘optimal’ speed, the net mass-specific cost of transport (COT,  $\text{J kg}^{-1} \text{m}^{-1}$ ) is up to 33% higher in children under 9 years old (Bolster et al., 2017; DeJaeger et al., 2001; Morgan et al., 2002). With walking speeds normalized to the Froude number, DeJaeger et al. (2001) found that differences in net COT may largely be reduced; thus, body size alone may account for the higher net COT observed in young children. However, Schepens et al. (2004) found that efficiency, defined as the ratio of the total mechanical power to the net energy consumption rate, is much lower in younger children. If mechanical power incurs a relatively greater cost in younger children, this again raises the question as to the extent to which muscular capacity and control play a role in explaining higher net COT. Taken together, these insights suggest a functional, mechanistic explanation for why young children are less economical at walking than adults (Schepens et al., 2004).

To gain greater insight into a potential explanation, our objective was to use the methodology of simple biomechanical templates (see

Fig. 1) to investigate how the generation of limb forces and the resulting motion of the COM in children may differ from that in adults, and thus may relate to their metabolic differences. We took a systematic approach by breaking down the walking gait cycle into distinct phases of double and single support, which resulted in three main hypotheses. In mature walking patterns, the legs must redirect the COM from a downward and forward velocity to an upward and forward velocity during double support, when both the leading and trailing limb are in contact with the ground (Kuo et al., 2005). This redirection, also called the step-to-step transition, is considered a major determinant of the metabolic cost of walking in adults (Donelan et al., 2002), and has also been studied in 12–18 month old toddlers (Hallemans et al., 2004). For our first aim, we sought to compare the positive external mechanical work ( $W_{\text{ext}}^+$ ) performed by the trailing leg in young children (age 5–6 years) and adults (age 18–30 years), with adults representing the ‘ideal’ behavior. We hypothesized (hypothesis 1a) that after accounting for differences in mass and dimensionless walking speed, the trailing limb in young children would produce less  $W_{\text{ext}}^+$  during double support. This hypothesis was based on literature that supports the idea that during development, children gradually tune and increase their anterior–posterior propulsive forces (Bril et al., 2015), indicating that, when normalized to body mass, children aged 3–8 years generate less power at the ankle than adults (Chester et al., 2006). Young children also typically produce asymmetric vertical ground reaction forces while walking (Preis et al., 1997; Takegami, 1992; Usherwood et al., 2018), suggesting that children do not transition from one step to the next like adults.

Inspired by the bipedal walking spring mass model of Geyer et al. (2006), we also set out to compare how young children and adults modulate the distance between their COM and center of pressure during single support, which reflects the spring-like behavior of the leg. From the perspective of a spring–mass model (Geyer et al., 2006), the redirection of the COM can be achieved by the release of elastic energy that was stored during single support. At the beginning of single support, when the leg extends and the COM rises, elastic energy that was absorbed during the double support may be released, and subsequently, as the COM descends during the second half of single support, elastic energy can be stored in preparation for double support (Donelan et al., 2002). This appears

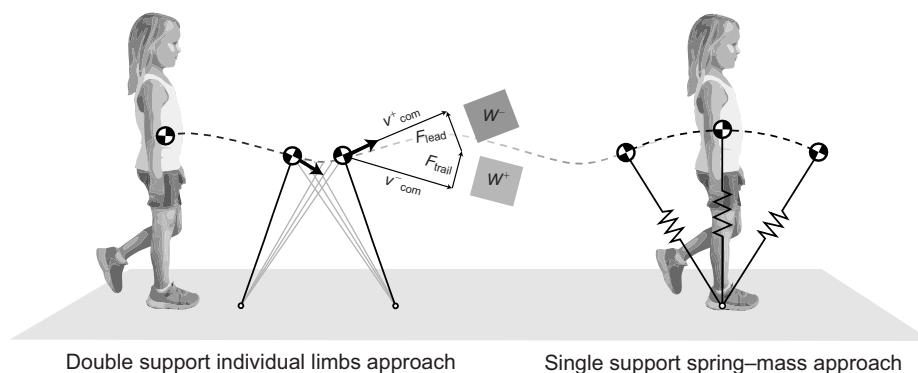

**Fig. 1. Geometric diagrams illustrating the templates used to analyze the mechanics of walking in children.** For both templates, ground reaction force data were used to calculate center of mass (COM) velocity and position. Following the dynamic walking model (left), we quantified the mechanical work generated by the individual limbs during double support (Donelan et al., 2002), a key determinant in transitioning the body’s COM from the trailing leg to the leading leg. In recognizing the contributions of elastic energy storage and return to the work done on the COM, we quantified the spring stiffness,  $k$ , of the leg as proposed by the spring–mass model (Geyer et al., 2006). As a simple approach, we quantified the spring-like behavior of the leg during single support (right), as this is the period when the leg ‘spring’ would undergo energy release as the spring extends and the COM reaches its maximum height at midstance. Then, as the COM moves forward and its height decreases, the spring compresses and stores energy. The diagram depicting the step-to-step transition during double support is modified after Kuo et al. (2005).  $v$ , velocity;  $F$ , force;  $W$ , work.

to be the ideal behavior in adults, whereby step-to-step transitions are facilitated by the ability of the leg to store and release elastic energy and, thus, operate much like a spring. In contrast to adults, a child's leg consists of immature muscles and tendons and may not operate like an ideal spring. In addition, single support is also the phase that requires postural adjustment to stabilize the body in an upright position. The COM is accelerated forward and sideways at the same time toward the swing leg (Bril et al., 2015), having a destabilizing effect. Modulating the distance between the COM and center of pressure, i.e. the COM spring length, during single support may be less precise in children and require more muscle co-contraction and activation (Grosset et al., 2008; Lambertz et al., 2003). These biomechanical constraints would ultimately raise the net COT during walking and, therefore, we hypothesized (hypothesis 2) that after considering dimensionless speed and scaling for size, the stiffness of the COM spring ( $k$ ) in children would differ from that of adults. Although we attempted to form a directional hypothesis, the literature provided us with conflicting evidence and scaling methods from hopping experiments that quantified spring stiffness from the COM as carried out in this study. For instance, Beerse and Wu (2016) found that when hopping at frequencies below, at and above preferred values, 5–11 year old children adopt a greater vertical COM spring stiffness, when normalized to body weight, but not to leg length. Yet, Waugh et al. (2017) found mixed results when normalizing to both body weight and leg length, reporting that 8–9 year old children adopted similar normalized leg stiffness values to adults when hopping at preferred frequencies. They also found that when hopping at the lowest and highest frequencies (1.33 and 3.33 Hz), children adopted a much lower normalized leg stiffness value than adults. Therefore, it was not readily apparent as to how slightly younger, 5–6 year old children might modulate their COM spring stiffness when walking across slow to fast step frequencies. Regardless of directionality, a test of this hypothesis should give us insight into whether the walking mechanics of children mimic both the step-to-step transition and spring-like behavior observed in adults.

For both of these main hypotheses, we also explored whether young children would modulate their trailing limb work (hypothesis 1) and spring stiffness (hypothesis 2) in the same way as adults when meeting the demands of walking at a fixed speed, but at step frequencies slower and faster than preferred. Therefore, we tested these hypotheses under conditions in which children and adults walked at their preferred speed and across a range of slow to fast step frequencies set at 75%, 100% and 125% of their preferred step frequency. Faster step frequencies involve shorter step lengths, while slower step frequencies involve longer step lengths. At slower step frequencies, the angle between the legs at the instance of double support increases and vice versa at faster step frequencies. According to the individual limbs model, positive mechanical work at push-off depends on both the COM velocity and the angle between the legs (Donelan et al., 2002). Following that model, we expected (hypothesis 1b) more propulsive trailing limb work at the slower step frequency condition for both adults and children. In regard to the bipedal spring–mass model, we expected that a slower step frequency would yield a decrease in the touchdown angle of the leading limb; however, both touchdown angle and  $k$  vary within a large range (Geyer et al., 2006), so we could not formulate a straightforward, predictive hypothesis as to how  $k$  might change with step frequency.

Overall, we reasoned that changes in the mechanical demands of modulating step frequency would result in greater metabolic demands for young children. Specifically, when challenged to walk at the slowest step frequency, which requires the largest step lengths,

young children would likely consume metabolic energy at greater rates, and hence would have a greater net COT when compared with the other step frequency conditions. Given known differences in a child's muscle and tendon morphology, and ankle power generation, and their lower walking efficiencies, we hypothesized (hypothesis 3) that, when compared with adults, young children would incur a greater net COT to modulate their step frequency than adults. In particular, we expected that the legs would be required to generate the greatest amount of mechanical work at the slowest step frequency condition, and that the extra mechanical demand would be more costly for children than for adults.

## MATERIALS AND METHODS

### Experimental procedures

Healthy young adults (aged 18–32 years,  $n=8$ ) and typically developing, healthy children (aged 5–6 years,  $n=8$ ) were recruited locally. Adult subjects gave their written informed consent to participate. Parents of child subjects gave permission and written informed consent, and children gave verbal assent to participate, in accordance with ethical guidelines and as approved by the University of Houston Institutional Review Board. To ensure that we captured the most natural walking patterns and comfort with the testing environment, children visited the lab for a preliminary 1.5 h practice session the day before the experiment was performed. For the child cohort, a parent was present during all parts of the experiment and gave encouragement when necessary.

On the day of the experiment, subjects arrived having fasted and refrained from caffeine or exercise for at least 3 h. Upon arrival at the lab, subjects rested for 10 min before we measured their standing metabolic rate for 5 min using an open circuit TrueOne 2400 metabolic system (ParvoMedics, Inc., Sandy, UT, USA). The metabolic system was calibrated immediately before each session using standard gases and a 3 l syringe. Following the standing trial, reflective markers (15.9 mm) were placed according to the manufacturer's guidelines (Lower Body Plug-in Gait, 100 Hz; Vicon 12-camera system, Nexus 1.8.5, Vicon, Oxford, UK) and the standard scaling and calibration protocol of the Nexus 1.8.5 software was followed. An additional marker was placed at the subject-specific location of the COM as determined by the reaction board method (Enoka, 2015). All subjects (Table 1) wore their own shirt, bike shorts and tennis shoes with a heel–sole difference no greater than 6.4 mm.

Each subject then walked on a level dual belt instrumented treadmill (1000 Hz; Bertec Co., Columbus, OH, USA) at their preferred speed. Preferred speed was obtained through feedback by having subjects walk at increasing increments of speed (starting from 0.3 m s<sup>-1</sup> in the child group and 0.5 m s<sup>-1</sup> in the adult group).

**Table 1. Subject characteristics**

|                                                | Children   | Adults     |
|------------------------------------------------|------------|------------|
| Sex (M/F)                                      | 4/4        | 4/4        |
| Age (years)                                    | 5.43±0.53  | 26.38±4.40 |
| Height (m)                                     | 1.22±0.04  | 1.72±0.08  |
| Mass (kg)                                      | 24.77±5.60 | 75±17.40   |
| Spring length (m)                              | 0.70±0.06  | 1.03±0.06  |
| Leg length (m)                                 | 0.62±0.03  | 0.92±0.05  |
| Preferred speed (m s <sup>-1</sup> )           | 0.52±0.13  | 1.13±0.18  |
| Froude number                                  | 0.20±0.01  | 0.40±0.01  |
| Step frequency achieved vs cued (% difference) | 2.47±2.73  | 0.66±1.30  |

Values are means±s.d. Percentage difference in step frequency is at the preferred frequency condition.

Once they reached a preferred walking speed, speed was increased again and lowered if necessary, to confirm their preferred walking speed (Arellano et al., 2009). Following a 5 min rest, subjects then walked for 5 min at preferred walking speed and were instructed to match their step frequency to the sound of a metronome at 75%, 100% and 125% of preferred step frequency (order randomized). Subjects sat for a 5 min rest period between trials. All subjects achieved a steady rate of metabolic energy consumption with respiratory exchange ratios (RER) remaining within the normal physiological range below 1.0.

### Data analysis

Walking metabolic power ( $\text{W kg}^{-1}$ ) was calculated from average  $\dot{V}_{\text{O}_2}$  and  $\dot{V}_{\text{CO}_2}$  during the last 3 min of each trial (Brockway, 1987). The average quiet standing value was subtracted from the average walking value to yield net metabolic power ( $\text{W kg}^{-1}$ ). Net metabolic power was divided by speed ( $\text{m s}^{-1}$ ) to obtain net COT expressed in units of  $\text{J kg}^{-1} \text{m}^{-1}$ . Data were filtered using a 4th order, zero-lag low-pass Butterworth filter with a cut-off frequency of 15 Hz for force and 6 Hz for motion data. All data were processed in Matlab (R2018b, The MathWorks, Natick, MA, USA) and custom code was written to calculate values for limb work and power (Donelan et al., 2002) and for values of leg stiffness,  $k$ , following a spring–mass model (Geyer et al., 2006). To identify gait cycle events and periods of double and single support, we defined touchdown and

toe-off as the instant when the vertical ground reaction force (GRF) crossed a threshold of 5% body weight. Double support was then defined as the portion of the gait cycle after touchdown of the leading limb, and before toe-off of the trailing limb. Single support was defined as the portion of the gait cycle between toe-off and touchdown when only one foot was in contact with the ground.

### Double support individual limbs method

Starting from the 3 min mark of each 5 min walking trial, filtered force data from periods of double support were aggregated to determine leading leg and trailing leg power and work. Following the method of Donelan et al. (2002), the velocity of the COM was determined by single integration. Then, the external mechanical power generated by the trailing and leading limb (as shown in Fig. 2) was determined by summing together the dot product of the force and velocity of the COM acting in each direction (Donelan et al., 2002):

$$P_{\text{lead}} = \text{Force}_{x,\text{lead}} \cdot \text{Velocity}_{x,\text{COM}} + \text{Force}_{y,\text{lead}} \cdot \text{Velocity}_{y,\text{COM}} + \text{Force}_{z,\text{lead}} \cdot \text{Velocity}_{z,\text{COM}}, \quad (1a)$$

$$P_{\text{trail}} = \text{Force}_{x,\text{trail}} \cdot \text{Velocity}_{x,\text{COM}} + \text{Force}_{y,\text{trail}} \cdot \text{Velocity}_{y,\text{COM}} + \text{Force}_{z,\text{trail}} \cdot \text{Velocity}_{z,\text{COM}}. \quad (1b)$$

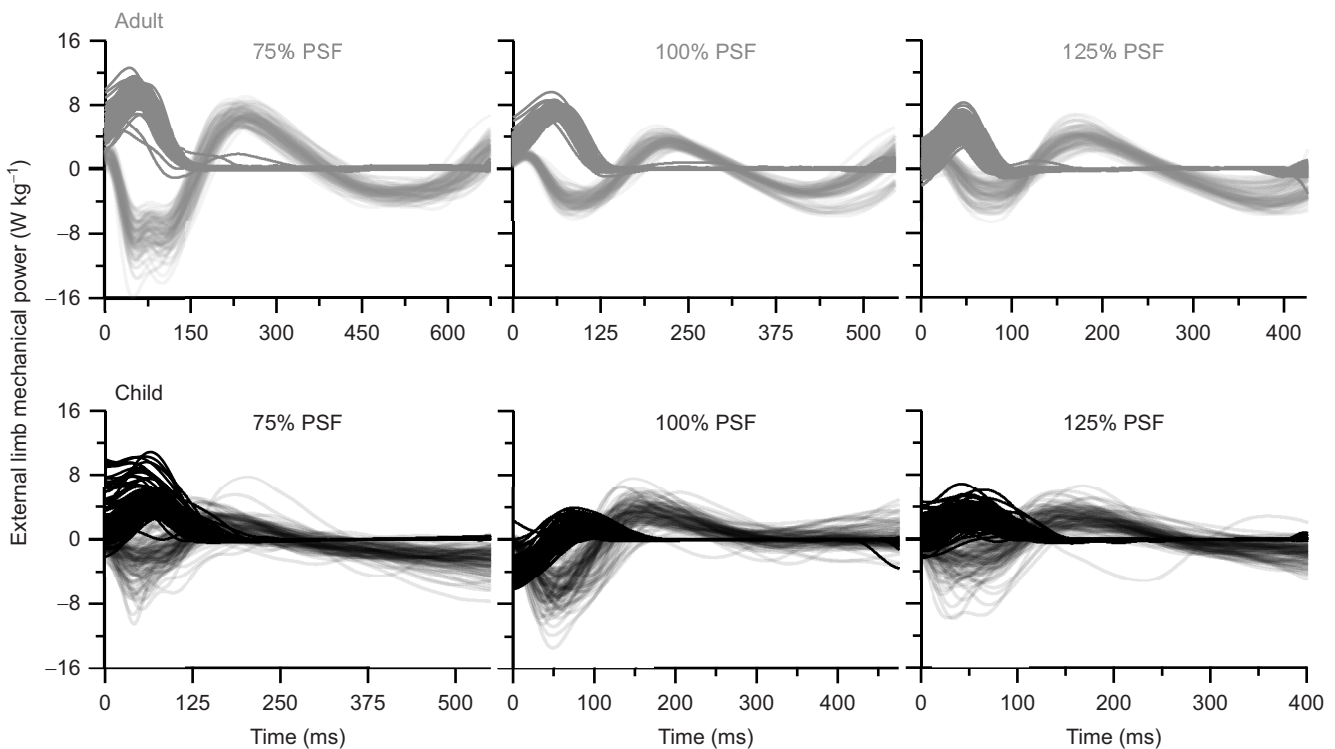

**Fig. 2. External mechanical power generated by the trailing and leading limb.** Examples of external mechanical power for an adult ( $n=1$ ; top) and child ( $n=1$ ; bottom) generated by the trailing (dark) and leading (light) leg during consecutive steps, under conditions of walking at their self-selected speed at 75%, 100% and 125% of preferred step frequency (PSF). For the adult subject walking at  $1.25 \text{ m s}^{-1}$  and at 100% PSF, the external mechanical power generated by the legs follows the typical pattern observed in young, healthy adults (Donelan et al., 2002), with the trailing and leading leg generating roughly equal positive and negative power during double support. In contrast, for the child walking at their self-selected speed of  $0.62 \text{ m s}^{-1}$  at 100% PSF, the leading and trailing legs transitioned from generating negative to positive external mechanical power during double support. In general, when walking at a fixed speed, but at variable step frequencies, the adult modulated the magnitude of the positive external mechanical power generated by their trailing leg, with the slower step frequency coinciding with higher positive power and the faster step frequency coinciding with lower negative power. The child, however, exhibited a strategy whereby the trailing leg no longer generates negative and positive power during double support (as observed at 100% PSF), but primarily generates positive power when walking at the slower and faster step frequency. To highlight the greater amount of variability observed in our child group, plots of external mechanical power as a function of time consist of 100 consecutive steps.



The magnitude of positive mechanical work of the trailing limb ( $W_{\text{trail}}^+$ , in J) was then calculated as the time integral of the positive portions of trailing limb power from Eqn 1b. For comparisons of young children and adults at their preferred speed ( $\text{m s}^{-1}$ ), the total  $W_{\text{trail}}^+$  was normalized to mass (Schepens et al., 2004) and averaged across the first 100 double supports starting from the 3 min mark.

### Single support spring–mass method

Again, starting from the 3 min mark of each 5 min walking trial, filtered force data from periods of single support were aggregated. We first found the position of the COM using double integration and then defined a vector from the COM to the foot's center of pressure to represent a virtual 2D spring in the sagittal plane. The markers at the COM and pelvis were used as an offset to reflect the absolute position of the COM after double integration, such that the COM was assumed to be within the body and half the distance between the anterior superior iliac spine and posterior superior iliac spine markers. Following the work of Gard et al. (2004), we assume that this method is a close approximation to the exact location of the COM and, more importantly, should reflect the trajectory and amplitudes that the COM undergoes during each step. As we were primarily interested in the lift and propulsion of the COM, we reasoned that a sagittal spring was an adequate starting point for comparisons. Plotting resultant 2D GRF (N) values as a function of spring length (m) allowed us to calculate the slope of the best-fit line via a least-squares regression analysis (Fig. 3). The mean of the absolute slopes estimated from the first 30 steps was reported as the value of  $k$ . This decision was based on our finding that adults exhibited consistent spring-like behavior that revealed best-fit line  $R^2$  values ranging from 0.5 to 0.9. However, children exhibited spring-like behavior that was much less consistent, so for fair comparisons, we limited the  $R^2$  values to 0.5 which allowed us to aggregate a minimum of 30 steps.

### Scaled speeds and touchdown angle

The Froude number, as shown in Eqn 2, normalizes speed based on pendular dynamics (Alexander and Jayes, 1983). We defined velocity,  $v$ , as the speed of the treadmill, and measured leg length as the distance between the anterior superior iliac spine to the distal tip of the medial malleolus. The dynamic walking model equations apply best when the body conforms to inverted pendulum dynamics (Kuo et al., 2005), so we chose to consider Froude speed ( $Fr$ ) in our comparison of individual limb work:

$$Fr = \frac{v^2}{gL_{\text{leg}}}. \quad (2)$$

To normalize  $k$ , we used the Groucho speed ( $Gr$ ), which was originally developed as a vertical speed parameter, combining interactions between effective vertical spring stiffness, gravity, impact velocity and body mass (McMahon et al., 1987). It has been mathematically adapted and used in two dimensions by also considering leg length (Blickhan, 1989). Essentially, for both the fore–aft and vertical directions, the Groucho speed can be calculated using Eqn 3a and normalized to leg length, where  $v$  is the resultant 2D velocity at the instant of touchdown,  $g$  is acceleration due to gravity and  $\omega$  is the natural frequency of the system as determined by spring stiffness,  $k$ , and body mass,  $m$ , as in Eqn 3b:

$$Gr = \frac{v\omega}{g}, \quad (3a)$$

$$\omega = \sqrt{k/m}. \quad (3b)$$

Because the Groucho number is a dimensionless speed based on a spring–mass model, we planned to use Groucho speed as a covariate in our comparison of  $k$ , but as explained in ‘Statistical analysis’, below, we instead used  $\hat{k}$ , which represents its non-dimensional form. Touchdown angle was determined in the sagittal plane as the angle formed at touchdown between a line created by the COM and lateral malleolus marker with respect to the horizontal. An alternative method for quantifying touchdown angle would be to create a line from the COM to the center of

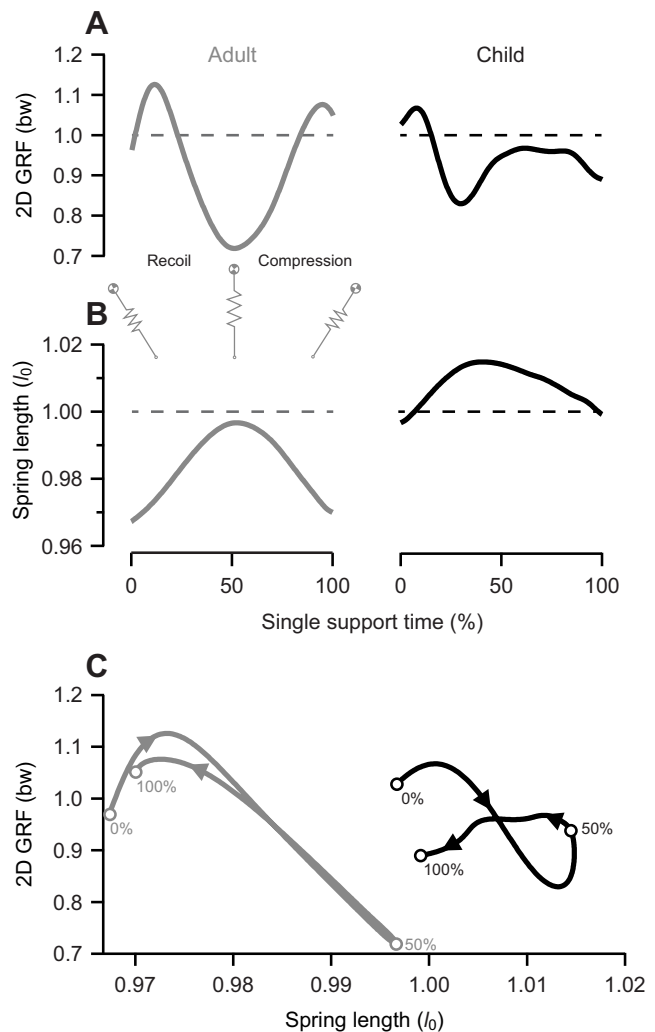

**Fig. 3. 2D ground reaction force (GRF) and spring length changes during single support.** (A,B) Representative adult ( $n=1$ ; left) and child ( $n=1$ ; right) 2D resultant GRF scaled to bodyweight (bw) (A) and 2D spring length as measured from the COM to the center of pressure, scaled to the standing height of the COM ( $l_0$ ) (B) during the single support phase at preferred step frequency. (C) Force–length curves show greater asymmetry and a flatter slope for a child subject. In line with the bipedal spring–mass model of Geyer et al. (2006), positive mechanical work at rebound (early single support) reflects recoil of the leg spring just after collision, while negative mechanical work in preload (late single support) reflects compression of the leg spring in preparation for propulsion. The convention here is that the absolute value of the slope equals the normalized spring stiffness,  $\hat{k}$ . The regression equations characterizing the linear fit for the adult and child force–length curves are  $2\text{GRF}(\text{bw}) = -14.11\text{spring length}(l_0) + 14.80$ ,  $r^2 = 91\%$ , and  $2\text{GRF}(\text{bw}) = -6.50\text{spring length}(l_0) + 7.50$ ,  $r^2 = 31\%$ , respectively. Note that the force–length curve for the child does not follow the typical spring-like behavior that was generally observed in adults; therefore, a sketch of the spring–mass model undergoing recoil and compression is not included.

pressure; however, the position of the center of pressure was inherently noisy and unreliable at touchdown. In the interest of reliability and ease of calculation, we used the lateral malleolus marker for estimating touchdown angles in the sagittal plane. We aggregated the touchdown angles from the entire 3 min and report the means in Table 2.

### Statistical analysis

We used separate mixed repeated measures ANCOVA with *a priori* planned comparisons to test for differences in  $W_{\text{trail}}^+$ , non-dimensional spring stiffness ( $\hat{k}$ ), touchdown angle and net COT. After checking for normality, we compared differences between groups at the three step frequencies by defining age and step frequency as a between- and within-subjects fixed factor, respectively. To account for differences in size and speed between children and young adults, we included in our analysis of  $W_{\text{trail}}^+$  the dimensionless speed Froude as a covariate.

Upon initial inspection of our Groucho speeds, we removed an outlier in the adult group so statistical comparisons for  $k$  were based on  $n=7$  in the adult group. Based on independent *t*-test at each step frequency (Table 2), we did not detect significant differences in Groucho speed between groups and therefore did not require Groucho as a covariate. We did not use Froude as a covariate for this analysis, as we were only concerned with single support and were using a theoretical model that is based on spring-mass dynamics, not pendular dynamics. To account for differences due to body size in our comparison of  $k$ , we transformed to non-dimensional  $\hat{k}$  using Eqn 4, where  $l$  is the maximum spring length,  $m$  is body mass and  $g$  is acceleration due to gravity:

$$\hat{k} = \frac{kl}{mg}. \quad (4)$$

For comparisons of touchdown angle and net COT ( $\text{J kg}^{-1} \text{m}^{-1}$ ), we included Froude as a covariate because these variables strongly depend on walking speed. During post-processing, we discovered that a hardware malfunction caused the force data to be erased for one child subject walking at 125% of their preferred step frequency. Therefore, statistical comparisons for mass-normalized  $W_{\text{trail}}^+$  and  $\hat{k}$  were based on a sample size of  $n=7$  in the child group. For our planned comparisons, we used independent *t*-tests when normality was met or Mann–Whitney *U*-tests when normality was not met. All data were analyzed in SPSS with statistical significance set at 0.05 (version 26, IBM, Armonk, NY, USA).

## RESULTS

### Touchdown angle

We used the Froude number as a covariate to compare touchdown angle between groups and confirmed that touchdown angle, an indirect gauge for detecting differences in step length, changed with step frequency as expected. A significant main effect for step frequency ( $F_{2,24}=3.324$ ,  $P=0.027$ ,  $\eta^2=0.217$ ) revealed that touchdown angle increased on average from  $\sim 72$  to  $78$  deg when changing from the relatively slow to fast step frequencies (Table 2). We did not detect a main effect for group or an interaction effect between group and step frequency, indicating that in response to the changing step frequencies, children and adults altered their touchdown angle in the same manner.

### Double support mechanics

Prior to conducting the statistical analysis, data were inspected to ensure assumptions were met for a repeated measures ANCOVA. We detected a significant within-subjects difference of  $W_{\text{trail}}^+$   $\text{kg}^{-1}$  across step frequencies ( $F_{2,24}=3.736$ ,  $P=0.039$ ,  $\eta^2=0.237$ ). As expected in adults, overall positive propulsive work was greater at longer step lengths (75% preferred step frequency) and less at

**Table 2. Descriptive statistics, pairwise and planned comparisons**

|                                             | Percentage preferred step frequency |       |     |                             |       |     |                             |       |     |
|---------------------------------------------|-------------------------------------|-------|-----|-----------------------------|-------|-----|-----------------------------|-------|-----|
|                                             | 75%                                 |       |     | 100%                        |       |     | 125%                        |       |     |
|                                             | Mean $\pm$ s.d.                     | $R^2$ | $N$ | Mean $\pm$ s.d.             | $R^2$ | $N$ | Mean $\pm$ s.d.             | $R^2$ | $N$ |
| $W_{\text{trail}}^+$ ( $\text{J kg}^{-1}$ ) |                                     |       |     |                             |       |     |                             |       |     |
| Child                                       | 0.063 $\pm$ 0.01                    |       | 8   | 0.061 $\pm$ 0.01            |       | 8   | 0.044 $\pm$ 0.01            |       | 7   |
| Adult                                       | 0.155 $\pm$ 0.01                    |       | 8   | 0.111 $\pm$ 0.01            |       | 8   | 0.087 $\pm$ 0.01            |       | 8   |
| Cohen's <i>d</i>                            | 9.20                                |       |     | 5.00                        |       |     | 4.30                        |       |     |
|                                             | <b><math>P&lt;0.001</math></b>      |       |     | <b><math>P=0.005</math></b> |       |     | <b><math>P=0.026</math></b> |       |     |
| $\hat{k}$                                   |                                     |       |     |                             |       |     |                             |       |     |
| Child                                       | 3.57 $\pm$ 3.74                     | 0.34  | 7   | 6.23 $\pm$ 5.32             | 0.40  | 7   | 10.66 $\pm$ 4.24            | 0.67  | 7   |
| Adult                                       | 6.99 $\pm$ 1.29                     | 0.62  | 7   | 10.64 $\pm$ 2.33            | 0.80  | 7   | 16.43 $\pm$ 4.09            | 0.84  | 7   |
| Cohen's <i>d</i>                            | 1.22                                |       |     | 1.07                        |       |     | 1.38                        |       |     |
|                                             | <b><math>P=0.035</math></b>         |       |     | <b><math>P=0.039</math></b> |       |     | <b><math>P=0.024</math></b> |       |     |
| Touchdown angle (deg)                       |                                     |       |     |                             |       |     |                             |       |     |
| Child                                       | 72.88 $\pm$ 3.95                    |       | 8   | 73.96 $\pm$ 2.76            |       | 8   | 77.61 $\pm$ 3.07            |       | 7   |
| Adult                                       | 71.33 $\pm$ 3.56                    |       | 8   | 75.07 $\pm$ 2.48            |       | 8   | 77.72 $\pm$ 2.96            |       | 8   |
| Groucho/leg length                          |                                     |       |     |                             |       |     |                             |       |     |
| Child                                       | 0.040 $\pm$ 0.03                    |       | 8   | 0.030 $\pm$ 0.01            |       | 8   | 0.047 $\pm$ 0.02            |       | 7   |
| Adult                                       | 0.038 $\pm$ 0.01                    |       | 7   | 0.039 $\pm$ 0.01            |       | 7   | 0.051 $\pm$ 0.01            |       | 7   |
|                                             | $P=0.911$                           |       |     | $P=0.120$                   |       |     | $P=0.585$                   |       |     |
| Peak power timing difference (%)            |                                     |       |     |                             |       |     |                             |       |     |
| Child                                       | 3.94 $\pm$ 11.14                    |       | 8   | 4.43 $\pm$ 9.53             |       | 8   | 5.921 $\pm$ 9.25            |       | 7   |
| Adult                                       | -0.47 $\pm$ 1.34                    |       | 8   | 2.34 $\pm$ 7.76             |       | 8   | -0.230 $\pm$ 5.54           |       | 8   |
|                                             | $P=0.700$                           |       |     | $P=0.890$                   |       |     | $P=0.856$                   |       |     |

Positive mechanical work of the trailing limb ( $W_{\text{trail}}^+$ ) and touchdown angle values were evaluated at Froude number  $Fr=0.3$  with ANCOVA that yielded a significant main effect for group comparisons with non-dimensional stiffness ( $\hat{k}$ ) were followed up with *a priori t*-test when significant. Planned comparison between groups for Groucho/leg length was carried out with an independent *t*-test. The timing of peak leading limb minus peak trailing limb power, normalized to step time, was evaluated at  $Fr=0.3$  with *post hoc* ANCOVA. Bold indicates significance.

shorter step lengths (125% preferred step frequency; Fig. 4A). This was not so in the child group, as confirmed by our detection of an interaction effect ( $F_{2,24}=5.216$ ,  $P=0.013$ ,  $\eta^2=0.303$ ), indicating that children did not modulate the amount of  $W_{\text{trail}}^+$   $\text{kg}^{-1}$  when walking at longer and shorter steps associated with the 75% and 125% step frequency condition, respectively (Fig. 4A). Between-group comparisons across step frequency conditions confirmed that children and adults generated 0.06 and 0.12  $\text{J kg}^{-1}$  of trailing limb mass-specific positive work, respectively ( $F_{1,12}=14.106$ ,  $P=0.002$ ,  $\eta^2=0.54$ ). Pre-planned ANCOVA comparisons between groups confirmed that children generated lower  $W_{\text{trail}}^+$   $\text{kg}^{-1}$  than adults at each step frequency condition (Table 2; all  $P<0.05$ ).

### Single support spring-mass mechanics

After checking that the statistical assumptions were met for a repeated measures ANOVA, we detected a main effect for group ( $F_{1,12}=6.831$ ,  $P<0.001$ ,  $\eta^2=0.363$ ) and step frequency ( $F_{2,24}=46.43$ ,  $P<0.001$ ,  $\eta^2=0.795$ ), but no interaction effect ( $P=0.41$ ). At the slow step frequency associated with longer steps,  $\hat{k}$  decreased, and at the fast step frequency associated with shorter steps,  $\hat{k}$  increased (Fig. 4B). Overall, children walked with an average  $\hat{k}$  equal to 6.82, almost 2-fold more compliant than adults, who walked with an average  $\hat{k}$  equal to 11.35. The much more compliant  $\hat{k}$  observed in children was consistent at each step frequency condition (all  $P<0.05$  for all *a priori* independent *t*-tests; Table 2).

### Net metabolic COT

Prior to conducting the analysis, data were inspected to ensure assumptions were met for a mixed design and that the Froude number was an appropriate covariate. A main effect for step frequency ( $F_{2,28}=19.656$ ,  $P<0.001$ ,  $\eta^2=0.584$ ) revealed a higher net COT when walking at step frequencies above and below preferred values. We also detected a main effect for group ( $F_{1,14}=31.84$ ,  $P<0.001$ ,  $\eta^2=0.695$ ), revealing that the net COT was, on average, 36% higher in children (Fig. 4C). However, we did not detect an interaction effect ( $P<0.05$ ), indicating that across slow and fast step frequencies, the net COT changed in a similar way for adults and children. And finally, when adjusted for group differences in the Froude number, the mean values show that in both children and adults, the net COT increased when walking at the relatively slow and fast step frequencies.

### DISCUSSION

We analyzed experimental data using simple models of walking to compare COM mechanics and net COT in a group of young children with those of adults, who represent the ideal behavior these simple models are based upon. One key finding was that trailing limb positive work normalized to mass,  $W_{\text{trail}}^+$   $\text{kg}^{-1}$ , was significantly lower across conditions in children. This supported our first hypothesis. However, in contrast to the other variables tested, the magnitude of this difference changed depending on the step frequency condition. The largest deficit was evident at 75% step frequency – the condition that required subjects to take the longest

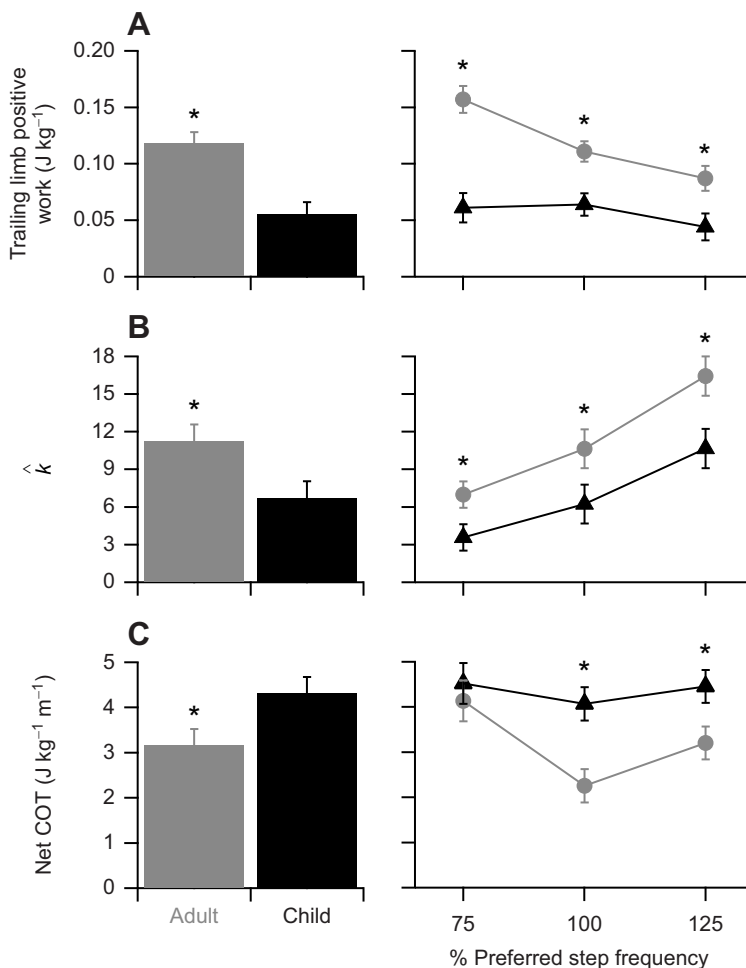

**Fig. 4. Double and single support mechanics and net cost of transport (COT).** (A) Left: the positive work generated by the trailing limb is smaller in children than in adults ( $n=7$  for each group; \*significant group effect  $P=0.039$ ). Right: in response to walking at relatively slow, preferred and fast step frequencies, adults (gray) altered the positive work generated by the trailing limb; however, children (black) showed little to no change in trailing limb positive work (\*significant interaction effect,  $P=0.013$ ). (B) Left: when compared with adults, children operated their leg stiffness with a lower  $\hat{k}$  ( $n=7$  for each group; \*significant group effect,  $P<0.001$ ). Right: however, when walking across a range of relatively slow and fast step frequencies, children and adults modulated  $\hat{k}$  in the same way (no interaction effect,  $P=0.41$ ). (C) Differences in trailing limb positive work and  $\hat{k}$  were associated with differences in the net COT required to walk. Left: overall, children walked with a 36% higher net COT ( $n=8$  for each group; \*significant group effect,  $P=0.03$ ). Right: however, both children and adults increased their net COT in response to walking at relatively slow and fast step frequencies, exhibiting a U-shaped trend (no interaction effect,  $P>0.05$ ). Note that for the repeated measures ANCOVA, average values for trailing limb positive work and net COT were adjusted at a Froude number equal to 0.3. For all values, error bars represent s.e.m. Significant differences between children and adults at each step frequency (right) are marked by an asterisk, denoting  $P<0.05$ .

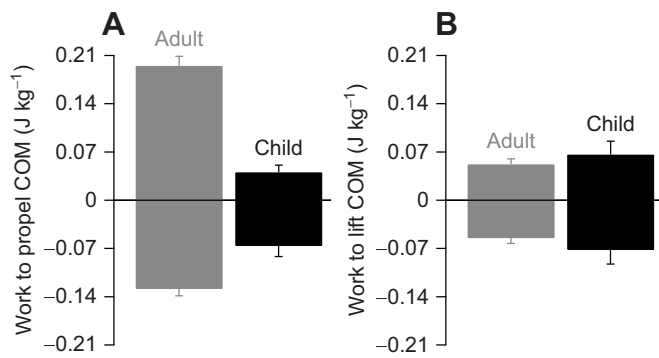

**Fig. 5. Mass-specific work required to lift versus propel the COM.**

Partitioning the mean mass-specific work of both limbs revealed that children performed (A) much less work to propel the COM than adults, but (B) slightly greater work to lift the COM. Note that the trailing limb in the child group performed both positive and negative work in double support, while the trailing limb in the adult group was only used to generate positive work.

steps. From Donelan et al. (2002) and Kuo et al. (2005), it is predicted that longer steps will increase the collision of the leading leg with the ground, effectively increasing negative work generated by the leading limb. To account for this greater negative work, the trailing limb must generate more positive work. Yet children did not generate the positive work that would be expected to account for the increased collision forces that are associated with taking long steps at a fixed speed.

When subjects were walking at their preferred step frequency, we found that, in children, the trailing limb is used to both absorb and generate work, while in adults, the trailing limb only generates positive work, providing almost 100% of their propulsive positive work (e.g. Fig. 2, middle column). In adults, there seems to be a clear role for the trailing limb to generate positive work and the leading limb to generate negative work, whereas young children used both limbs to generate both positive and negative work. Halleman et al. (2004) reports that in toddlers (12–18 months), an inefficient inverted pendular mechanism of energy exchange contributes to differences in external mechanical work. Toddlers are described as utilizing a ‘tossing gait’, where work that is performed to lift the COM against gravity is much greater than work that is performed to propel the COM. In our age group of 5–6 year olds, gait patterns are considered more mature than in toddlers. Yet, when partitioning the positive and negative work generated by each limb during double support, we also found (as in Halleman et al.,

2004) that our child subjects tended to generate more mass-specific work to lift the COM than in adults. However, one key difference was that the mass-specific work to lift versus propel the COM was approximately equal for our child subjects (Fig. 5), suggesting a possible shift with age toward more mature patterns when work to propel the COM dominates.

In single support, we found that after scaling for size and speed,  $\hat{k}$  was approximately 40% lower in our child group, which supports our second hypothesis. While  $\hat{k}$  was substantially lower in our child group, they did modulate  $\hat{k}$  in the same way as adults. As shown in Fig. 4B, both young children and adults increased  $\hat{k}$  when meeting the mechanical demands of walking at fixed speed, but at relatively slower to faster step frequencies. The tendency of children to modulate  $\hat{k}$  was independent of changes in the amount of positive work generated by their trailing limb during double support. This behavior deviated from that observed in adults, where the positive work generated by the trailing limb during double support decreased and  $\hat{k}$  increased across slow to fast step frequencies. Unlike trailing limb work, which has been shown to rely primarily on plantar flexor muscles and tendons (Fukunaga et al., 2001; Ishikawa et al., 2005; Sawicki and Khan, 2016),  $\hat{k}$  can be influenced by multiple muscles and joints, such as the ankle, knee and hip. Thus, it is possible that both the more compliant  $\hat{k}$  and the inability to generate as much scaled work and power by the trailing limb may be related to a young child’s developing muscular capacity. Over time, as children learn to coordinate their leg and hip muscles to generate propulsive work, the motion of the COM during walking may become smoother, reflecting patterns that are observed in adults. Given evidence of structural differences of immature plantar flexor muscle and tendon (Radnor et al., 2018; Waugh et al., 2012), and functional differences in muscle and tendon interactions in children measured directly by ultrasound while hopping (Waugh et al., 2017), it seems likely that the coordination of the plantar flexor muscle–tendon mechanics responsible for efficient propulsion and redirection of the COM in adults is not fully formed and learned at 5–6 years of age.

The unequal contribution of work by the trailing limb in young children could also help explain their decreased efficiency (Schepens et al., 2004), as positive work is necessary to restore the energy that is lost from the unavoidable collision phase of double support (Donelan et al., 2002). Lost energy must then be replaced with more costly compensation strategies, possibly at other joints such as the hip (Lye et al., 2016; Sawicki et al., 2009), and with coactivation of other muscles (Lambertz et al., 2003). This would ultimately raise the net COT, which is what we observed in

**Table 3. Metabolic (net cost of transport, COT) repeated measures ANCOVA results, ANCOVA pairwise comparisons and *post hoc* results for child group**

|                                                                            | Effects                          | <i>F</i> or <i>t</i>       | <i>P</i>       |
|----------------------------------------------------------------------------|----------------------------------|----------------------------|----------------|
| Net COT (J kg <sup>-1</sup> m <sup>-1</sup> )                              | Step frequency                   | <i>F</i> =3.805, d.f.=2,26 | <b>0.036*</b>  |
|                                                                            | Group                            | <i>F</i> =4.003, d.f.=1,13 | <b>0.034*</b>  |
|                                                                            | Group×Step frequency             | <i>F</i> =2.112, d.f.=2,26 | 0.071          |
|                                                                            | Conditions                       |                            |                |
|                                                                            | Children and adults at 75%       | <i>F</i> =0.232, d.f.=1,16 | 0.319          |
|                                                                            | Children and adults at 100%‡     | <i>F</i> =7.653, d.f.=1,16 | <b>0.008**</b> |
|                                                                            |                                  | <i>U</i> =49               | <b>0.001**</b> |
|                                                                            | Children and adults at 125%      | <i>F</i> =3.752, d.f.=1,16 | <b>0.038*</b>  |
| Net COT in child group<br>( <i>post hoc</i> paired-sample <i>t</i> -tests) | 75% to preferred step frequency  | <i>t</i> =2.210            | 0.032          |
|                                                                            | 125% to preferred step frequency | <i>t</i> =-2.118           | 0.036          |

Mean effect differences were evaluated at *F*=0.3. Net COT in the child group were evaluated with a Bonferroni adjusted alpha value of 0.025. \**P*<0.05, \*\**P*<0.01. ‡Comparison violated assumption of homogeneity of variances, so differences were analyzed with a Mann–Whitney *U*-test.



our 5–6 year old child group. Consistent with previous studies (DeJaeger et al., 2001; Morgan et al., 2002), our children had a higher net COT at each step frequency condition, even after accounting for differences in Froude speed. We did not detect an interaction effect between groups, signifying that children and adults had similar U-shaped trends in their net COT. Thus, we reject hypothesis 3 that walking at step frequencies below preferred values would be relatively more costly for children, when compared with adults. Yet, when compared with values in adults, net COT in children did not show a clear optimum, which was contrary to our expectation that their net COT would be minimized when walking at their preferred speed and step frequency (Fig. 4C). To confirm, we performed a *post hoc* paired sample *t*-test with a Bonferroni correction for the child group and found no significant difference in net COT between the preferred, slow and the fast step frequency condition (Table 3). This prompts the question as to whether 5–6 year old children are selecting gait parameters to minimize net COT, or perhaps something else, such as to minimize power generation as suggested by Usherwood et al. (2018).

Our results also triggered our curiosity about the relative timing of push-off and collision (Donelan et al., 2002; Kuo and Donelan, 2010), which may be a critical determinant in explaining the differences in the trailing limb positive work that we observed between children and adults. According to the individual limbs method, a pre-emptive or simultaneous trailing limb impulse (with the trailing limb exhibiting a peak in positive external mechanical power) minimizes the amount of work necessary to propel the COM during the step-to-step transition. To address our curiosity, we carried out a simple approach (refer to Adamczyk and Kuo, 2009 for a formal physics-based approach) by calculating the relative timing between the instance when the peak positive power (trailing limb; Fig. 2, dark lines) and peak negative power (leading limb; Fig. 2, light lines) occurred during double support. These data were taken over 100 steps, as described in Materials and Methods, and normalized to the time of each step. We then subtracted the time at peak positive trailing limb power (percentage of step) from the time of peak negative leading limb power (percentage of step) and report this as the mean peak power timing difference (Table 2). Difference values that are positive and close to zero indicate that the limbs are timing the generation of positive and negative peak power in a nearly simultaneous manner – reflecting a pre-emptive push-off strategy. Exact zero values signify simultaneous push-off and collision, and negative values signify a late push-off strategy. Overall, the values for children were highly variable, with magnitudes ranging below and above zero, but on average, they showed positive values, indicating a preference for children and adults to utilize a pre-emptive push-off strategy when walking at preferred step frequency. At the slow and fast step frequency, children also had a preference to utilize a pre-emptive push-off strategy, while adults had a preference to utilize a slightly late push-off strategy. These slight differences between children and adults were not significant (see Table 2 for details on *post hoc* analyses), indicating that they utilized a similar timing strategy to help minimize the work necessary to propel the COM during the step-to-step transition.

During the first 7–13 years of life, walking patterns vary in their maturity, so interpretation of our results is limited to children aged 5–6 years, which comprised a relatively small group size. Yet, it is worth noting that our effect sizes (Cohen's *d*) are between 1.07 and 9.2 (Table 2), which may be helpful for future reference. At this age, we observed a high amount of variability in the GRF patterns, consistent with previous studies (Kraan et al., 2017). It is possible

that the variability in GRF patterns might have another purpose, such as for motor learning, where the goal is to learn how to efficiently redirect the COM. This variability ultimately meant that when comparing  $\hat{k}$ , we were only able to reliably take 30 steps from each trial that met our condition of a reasonable linear fit between force and spring length changes during single support. In addition, the highly variable patterns between force and spring length in children raises the question as to whether it is appropriate to model and fit a 'spring' to the mechanical behavior observed during single support. Our observations suggest that 5–6 year old children do not operate their legs like a simple spring–mass system. Instead, their mechanical behavior follows the sequence of a damper then motor. Yet, it was only until we attempted to model the behavior like a spring that we concluded that a spring-based adult model does not seem appropriate to describe the mechanics of young children. Therefore, these comparisons were necessary and helpful in allowing us to reach this level of insight. In general, the complex relationships between age, size, mechanics and the spatiotemporal components of walking remain to be understood, and we lack a complete understanding of their contributions to the higher net COT observed in children.

A lingering question that we did not attempt to answer in this study is whether changes in leg swing cost, when walking at step frequencies below and above preferred values, could explain the differences in net COT between children and adults. A simple passive dynamic model proposed by Kuo (2001) suggests that adult humans prefer speeds that minimize the net COT, which is driven by balancing the cost incurred for step-to-step transitions and the cost of leg swinging. The cost of leg swing in adults has been estimated to comprise between 10% and 33% of the net metabolic cost of walking at preferred speeds (Doke et al., 2007; Gottschall and Kram, 2003; Umberger, 2010). However, the cost of leg swinging will change when walking at a fixed speed, but at variable step frequencies. In isolated leg swinging experiments in adults, there is a substantial increase in the cost to swing the legs at frequencies above and below preferred values (Doke et al., 2007). When walking at step frequencies above and below preferred values, it is likely that both adults and children in this study incurred a greater cost to swing the legs, but how much remains unknown. In addition, the allocation between step-to-step transition cost and leg swing cost may differ between adults and developing children. In the future, we intend to explore how developing children modulate the potential trade-off between minimizing the cost associated with step-to-step transitions and the cost of swinging the legs. Understanding these relationships in developing children could offer unique insight into how human locomotion behavior evolves across early childhood to adulthood.

In summary, when compared with adults, we found that when walking at a fixed speed, but at relatively slow and fast step frequencies, 5–6 year old children generated significantly less positive work by their trailing limb during double support. We also found that  $\hat{k}$ , representing spring-like behavior during single support, was much more compliant in children than in adults. These variables were scaled to speed, mass and leg length, yet the mechanics of walking in children departed substantially from that of adults, who have long been seen as the ideal behavior for economical walking. Altogether, our findings suggest that the simple models used here cannot be scaled down and used to adequately characterize a child's walking mechanics and energetics. The implications from this work are worth further consideration because simple models form the basis for more complex theoretical and computational models and aid in the design of assistive devices such as lower limb prostheses and orthoses (Delp et al., 2007; Gard and Childress, 2001; Geyer and Herr, 2010). Prosthetic foot and ankle

rollover shapes and custom orthotic foot rockers are designed and aligned from the simple stance phase inverted pendulum model for adults. As opposed to relying on models that are scaled down versions of those for adults, we propose that a limb-level biomechanical analysis of walking in children may facilitate the selection and tuning of assistive devices that are specifically designed for children. For example, rather than focus on propulsion or the energy storage and return characteristics of a prosthetic foot and ankle for walking, young children may benefit from greater vertical stability and support, where the typically developing children in our study partitioned the most work (Fig. 5). Several questions remain as to how we can explain the mechanical and metabolic cost differences in children. Follow up studies examining postural and kinematic differences at the limb and joint level, as well as an in-depth analysis of moment–angle loops and the mechanical power profiles at each of the lower limb joints, would provide much needed insight. It is also well known that adults can successfully tune and utilize the Achilles tendon to store and release energy to generate propulsive work (Fukunaga et al., 2001; Ishikawa et al., 2005; Lichtwark and Wilson, 2008), directing the focus of engineers and clinicians to the ankle as a first line target for assistive technology in gait rehabilitation. However, little is understood about plantar flexor muscle–tendon function in children, who also require this technology and who, in our study, did not generate comparable positive propulsive work by their trailing limb. Combining limb-level and joint-level biomechanical analyses with ultrasound measurements of plantar flexor muscle–tendon function is of future interest, as this would help us to understand the unique strategies that children use to meet the mechanical power demands of walking across a range of speeds and uphill/downhill conditions.

#### Acknowledgements

We thank the children and their parents for their participation in this study. We acknowledge Anna Larsson, Daisey Vega and Danny Guevara for their assistance with data collection and for the University of Houston Department of Health and Human Performance for supporting the completion of this study and manuscript preparation.

#### Competing interests

The authors declare no competing or financial interests.

#### Author contributions

Conceptualization: V.L.R., C.J.A.; Methodology: V.L.R., C.J.A.; Software: V.L.R., C.J.A.; Validation: V.L.R., C.J.A.; Formal analysis: V.L.R., C.J.A.; Investigation: V.L.R.; Resources: C.J.A.; Data curation: V.L.R., C.J.A.; Writing - original draft: V.L.R.; Writing - review & editing: V.L.R., C.J.A.; Visualization: V.L.R., C.J.A.; Supervision: C.J.A.; Project administration: C.J.A.; Funding acquisition: C.J.A.

#### Funding

This work was supported by University of Houston faculty start-up funds provided to C.J.A.

#### References

Adamczyk, P. G. and Kuo, A. D. (2009). Redirection of center-of-mass velocity during the step-to-step transition of human walking. *J. Exp. Biol.* **212**, 2668–2678. doi:10.1242/jeb.027581

Alexander, R. M. (1989). Optimization and gaits in the locomotion of vertebrates. *Physiol. Rev.* **69**, 1199–1227. doi:10.1152/physrev.1989.69.4.1199

Alexander, R. M. and Jayes, A. S. (1983). A dynamic similarity hypothesis for the gaits of quadrupedal mammals. *J. Zool.* **201**, 135–152. doi:10.1111/j.1469-7998.1983.tb04266.x

Antoniak, G., Biswas, T., Cortes, N., Sikdar, S., Chun, C. and Bhandawat, V. (2019). Spring-loaded inverted pendulum goes through two contraction–extension cycles during the single-support phase of walking. *Biol. Open* **8**, bio043695. doi:10.1242/bio.043695

Arellano, C. J., O'Connor, D. P., Layne, C. and Kurz, M. J. (2009). The independent effect of added mass on the stability of the sagittal plane leg kinematics during steady-state human walking. *J. Exp. Biol.* **212**, 1965–1970. doi:10.1242/jeb.026153

Beerse, M. and Wu, J. (2016). Vertical stiffness and center-of-mass movement in children and adults during single-leg hopping. *J. Biomech.* **49**, 3306–3312. doi:10.1016/j.jbiomech.2016.08.014

Blickhan, R. (1989). The spring-mass model for running and hopping. *J. Biomech.* **22**, 1217–1227. doi:10.1016/0021-9290(89)90224-8

Bolster, E. A. M., Balemans, A. C. J., Brehm, M.-A., Buizer, A. I. and DALLEMEIJER, A. J. (2017). Energy cost during walking in association with age and body height in children and young adults with cerebral palsy. *Gait Posture* **54**, 119–126. doi:10.1016/j.gaitpost.2017.02.026

Brenière, Y. and Bril, B. (1998). Development of postural control of gravity forces in children during the first 5 years of walking. *Exp. Brain Res.* **121**, 255–262. doi:10.1007/s002210050458

Bril, B., Dupuy, L., Dietrich, G. and Corbetta, D. (2015). Learning to tune the antero-posterior propulsive forces during walking: a necessary skill for mastering upright locomotion in toddlers. *Exp. Brain Res.* **233**, 2903–2912. doi:10.1007/s00221-015-4378-6

Brockway, J. M. (1987). Derivation of formulae used to calculate energy expenditure in man. *Hum. Nutr. Clin. Nutr.* **41C**, 463–471.

Cavagna, G. A. and Margaria, R. (1966). Mechanics of walking. *J. Appl. Physiol.* **21**, 271–278. doi:10.1152/jappl.1966.21.1.271

Chester, V. L., Tingley, M. and Biden, E. N. (2006). A comparison of kinetic gait parameters for 3–13 year olds. *Clin. Biomech.* **21**, 726–732. doi:10.1016/j.clinbiomech.2006.02.007

DeJaeger, D., Willems, P. A. and Heglund, N. C. (2001). The energy cost of walking in children. *Pflugers Arch.* **441**, 538–543. doi:10.1007/s004240000443

Delp, S. L., Anderson, F. C., Arnold, A. S., Loan, P., Habib, A., John, C. T., Guendelman, E. and Thelen, D. G. (2007). OpenSim: Open-Source Software to Create and Analyze Dynamic Simulations of Movement. *IEEE Trans. Biomed. Eng.* **54**, 1940–1950.

Dewolf, A. H., Sylos-Labini, F., Cappellini, G., Lacquaniti, F. and Ivanenko, Y. (2020). Emergence of different gaits in infancy: relationship between developing neural circuitries and changing biomechanics. *Front. Bioeng. Biotechnol.* **8**, 473. doi:10.3389/fbioe.2020.00473

Dierick, F., Lefebvre, C., Van Den Hecke, A. and Detrembleur, C. (2004). Development of displacement of centre of mass during independent walking in children. *Dev. Med. Child Neurol.* **46**, 533–539. doi:10.1017/S0012162204000891

Doke, J., Donelan, J. M. and Kuo, A. D. (2007). Mechanics and energetics of swinging the human leg. *J. Exp. Biol.* **210**, 2399. doi:10.1242/jeb.006767

Donelan, J. M., Kram, R. and Kuo, A. D. (2002). Mechanical work for step-to-step transitions is a major determinant of the metabolic cost of human walking. *J. Exp. Biol.* **205**, 3717–3727. doi:10.1242/jeb.205.23.3717

Enoka, R. M. (2015). *Neuromechanics of Human Movement*, 5th edn. Champaign, IL: Human Kinetics.

Fukunaga, T., Kubo, K., Kawakami, Y., Fukushima, S., Kanehisa, H. and Maganaris, C. N. (2001). In vivo behaviour of human muscle tendon during walking. *Proc. R. Soc. B Biol. Sci.* **268**, 229–233. doi:10.1098/rspb.2000.1361

Gard, S. A. and Childress, D. S. (2001). What determines the vertical displacement of the body during normal walking? *Journal of Prosthetics and Orthotics* **13**, 64–67.

Gard, S. A., Miff, S. C. and Kuo, A. D. (2004). Comparison of kinematic and kinetic methods for computing the vertical motion of the body center of mass during walking. *Human Movement Science* **22**, 597–610.

Geyer, H., Seyfarth, A. and Blickhan, R. (2006). Compliant leg behaviour explains basic dynamics of walking and running. *Proc. R. Soc. B Biol. Sci.* **273**, 2861–2867. doi:10.1098/rspb.2006.3637

Geyer, H. and Herr, H. (2010). A muscle-reflex model that encodes principles of legged mechanics produces human walking dynamics and muscle activities. *IEEE Transactions on Neural Systems and Rehabilitation Engineering* **18**, 263–273.

Gottschall, J. S. and Kram, R. (2003). Energy cost and muscular activity required for propulsion during walking. *J. Appl. Physiol.* **94**, 1766–1772. doi:10.1152/jappphysiol.00670.2002

Grabowski, A., Farley, C. T. and Kram, R. (2005). Independent metabolic costs of supporting body weight and accelerating body mass during walking. *J. Appl. Physiol.* **98**, 579–583. doi:10.1152/jappphysiol.00734.2004

Grosset, J. F., Mora, I., Lambert, D. and Pérot, C. (2008). Voluntary activation of the triceps surae in prepubertal children. *J. Electromyogr. Kinesiol.* **18**, 455–465. doi:10.1016/j.jelekin.2006.11.002

Halleman, A., Aerts, P., Otten, B., De Deyn, P. P. and De Clercq, D. (2004). Mechanical energy in toddler gait: A trade-off between economy and stability? *J. Exp. Biol.* **207**, 2417–2431. doi:10.1242/jeb.01040

Ishikawa, M., Komi, P. V., Grey, M. J., Lepola, V. and Brüggemann, G.-P. (2005). Muscle-tendon interaction and elastic energy usage in human walking. *J. Appl. Physiol.* **99**, 603–608. doi:10.1152/jappphysiol.00189.2005

Kraan, C. M., Tan, A. H. J. and Cornish, K. M. (2017). The developmental dynamics of gait maturation with a focus on spatiotemporal measures. *Gait Posture* **51**, 208–217. doi:10.1016/j.gaitpost.2016.10.021

Kramer, P. A. and Sartori-Miller, I. (2008). The energetics of human walking: is Froude number (Fr) useful for metabolic comparisons? *Gait Posture* **27**, 209–215. doi:10.1016/j.gaitpost.2007.03.009

- Kramer, P. A. and Sylvester, A. D.** (2013). Humans, geometric similarity and the Froude number: is "reasonably close" really close enough? *Biol. Open* **2**, 111-120. doi:10.1242/bio.20122691
- Kuo, A. D.** (2001). A simple model of bipedal walking predicts the preferred speed-step length relationship. *J. Biomech. Eng.* **123**, 264-269. doi:10.1115/1.1372322
- Kuo, A. D. and Donelan, J. M.** (2010). Dynamic principles of gait and their clinical implications. *Phys. Ther.* **90**, 157-174. doi:10.2522/ptj.20090125
- Kuo, A. D., Donelan, J. M. and Ruina, A.** (2005). Energetic consequences of walking like an inverted pendulum: step-to-step transitions. *Exerc. Sport Sci. Rev.* **33**, 88-97. doi:10.1097/00003677-200504000-00006
- Lambertz, D., Mora, I., Grosset, J.-F. and Pérot, C.** (2003). Evaluation of musculotendinous stiffness in prepubertal children and adults, taking into account muscle activity. *J. Appl. Physiol.* **95**, 64-72. doi:10.1152/jappphysiol.00885.2002
- Lichtwark, G. A. and Wilson, A. M.** (2008). Optimal muscle fascicle length and tendon stiffness for maximising gastrocnemius efficiency during human walking and running. *J. Theor. Biol.* **252**, 662-673. doi:10.1016/j.jtbi.2008.01.018
- Lye, J., Parkinson, S., Diamond, N., Downs, J. and Morris, S.** (2016). Propulsion strategy in the gait of primary school children: the effect of age and speed. *Hum. Mov. Sci.* **50**, 54-61. doi:10.1016/j.humov.2016.10.007
- Malloggi, C., Rota, V., Catino, L., Malfitano, C., Scarano, S., Soranna, D., Zambon, A. and Tesio, L.** (2019). Three-dimensional path of the body centre of mass during walking in children: an index of neural maturation. *Int. J. Rehabil. Res.* **42**, 112-119. doi:10.1097/MRR.0000000000000345
- McMahon, T. A., Valiant, G. and Frederick, E. C.** (1987). Groucho running. *J. Appl. Physiol.* **62**, 2326-2337. doi:10.1152/jappl.1987.62.6.2326
- Morgan, D. W., Tseh, W., Caputo, J. L., Keefer, D. J., Craig, I. S., Griffith, K. B., Akins, M.-B., Griffith, G. E. and Martin, P. E.** (2002). Longitudinal profiles of oxygen uptake during treadmill walking in able-bodied children: the locomotion energy and growth study. *Gait Posture* **15**, 230-235. doi:10.1016/S0966-6362(01)00160-6
- Preis, S., Klemms, A. and Müller, K.** (1997). Gait analysis by measuring ground reaction forces in children: changes to an adaptive gait pattern between the ages of one and five years. *Dev. Med. Child Neurol.* **39**, 228-233. doi:10.1111/j.1469-8749.1997.tb07416.x
- Radnor, J. M., Oliver, J. L., Waugh, C. M., Myer, G. D., Moore, I. S. and Lloyd, R. S.** (2018). The influence of growth and maturation on stretch-shortening cycle function in youth. *Sports Med.* **48**, 57-71. doi:10.1007/s40279-017-0785-0
- Sawicki, G. S. and Khan, N. S.** (2016). A simple model to estimate plantarflexor muscle-tendon mechanics and energetics during walking with elastic ankle exoskeletons. *IEEE Trans. Biomed. Eng.* **63**, 914-923. doi:10.1109/TBME.2015.2491224
- Sawicki, G. S., Lewis, C. L. and Ferris, D. P.** (2009). It pays to have a spring in your step. *Exerc. Sport Sci. Rev.* **37**, 130-138. doi:10.1097/JES.0b013e31819c2df6
- Schepens, B., Bastien, G. J., Heglund, N. C. and Willems, P. A.** (2004). Mechanical work and muscular efficiency in walking children. *J. Exp. Biol.* **207**, 587-596. doi:10.1242/jeb.00793
- Takegami, Y.** (1992). Wave pattern of ground reaction force of growing children. *J. Pediatr. Orthop.* **12**, 522-526. doi:10.1097/01241398-199207000-00021
- Umberger, B. R.** (2010). Stance and swing phase costs in human walking. *J. R. Soc. Interface* **7**, 1329-1340. doi:10.1098/rsif.2010.0084
- Usherwood, J. R., Hubel, T. Y., Smith, B. J. H., Self Davies, Z. T. and Sobota, G.** (2018). The scaling or ontogeny of human gait kinetics and walk-run transition: the implications of work vs. peak power minimization. *J. Biomech.* **81**, 12-21. doi:10.1016/j.jbiomech.2018.09.004
- Waugh, C. M., Blazeovich, A. J., Fath, F. and Korff, T.** (2012). Age-related changes in mechanical properties of the Achilles tendon. *J. Anat.* **220**, 144-155. doi:10.1111/j.1469-7580.2011.01461.x
- Waugh, C. M., Korff, T., Fath, F. and Blazeovich, A. J.** (2013). Rapid force production in children and adults: mechanical and neural contributions. *Med. Sci. Sports Exerc.* **45**, 762-771. doi:10.1249/MSS.0b013e31827a67ba
- Waugh, C. M., Korff, T. and Blazeovich, A. J.** (2017). Developmental differences in dynamic muscle-tendon behaviour: implications for movement efficiency. *J. Exp. Biol.* **220**, 1287-1294. doi:10.1242/jeb.127951
